# Supplementary material for: Antifreeze Peptides Preparation from Tilapia Skin and Evaluation of Its Cryoprotective Effect on Lacticaseibacillus rhamnosus
Source: MDPI journal article supplement (doi:10.3390/foods11060857), 2022-03-17
Supplement: s1 [file s1]

**Table S1.** Enzymatic hydrolysis variable and levels for central composite design

| Level | Amount of enzyme (A, U/g) | Solid-liquid Ratio (B, w/v) | Temperature (C, °C) | Time (D, h) |
|-------|---------------------------|-----------------------------|---------------------|-------------|
| -1    | 1500                      | 1:8                         | 45                  | 5           |
| 0     | 2000                      | 1:10                        | 50                  | 6           |
| 1     | 2500                      | 1:12                        | 55                  | 7           |

**Table S2.** Experimental design and results

| No. | Amount of enzyme (A, U/g) | Solid-liquid Ratio (B, w/v) | Temperature (C, °C) | Time (D, h) | Relative survival rate (%) |
|-----|---------------------------|-----------------------------|---------------------|-------------|----------------------------|
| 1   | 2000                      | 1:8                         | 50                  | 7           | 89.33                      |
| 2   | 2000                      | 1:8                         | 50                  | 5           | 87.69                      |
| 3   | 2500                      | 1:8                         | 50                  | 6           | 90.33                      |
| 4   | 2000                      | 1:8                         | 45                  | 6           | 82.13                      |
| 5   | 1500                      | 1:10                        | 45                  | 6           | 79.24                      |
| 6   | 2000                      | 1:10                        | 50                  | 6           | 93.53                      |
| 7   | 2000                      | 1:12                        | 50                  | 5           | 88.41                      |
| 8   | 2500                      | 1:10                        | 50                  | 7           | 92.57                      |
| 9   | 2000                      | 1:12                        | 55                  | 6           | 84.26                      |
| 10  | 2000                      | 1:10                        | 50                  | 6           | 93.15                      |
| 11  | 2000                      | 1:8                         | 55                  | 6           | 91.49                      |
| 12  | 2000                      | 1:10                        | 45                  | 7           | 92.15                      |
| 13  | 1500                      | 1:10                        | 50                  | 5           | 76.67                      |
| 14  | 2000                      | 1:12                        | 50                  | 7           | 93.42                      |
| 15  | 1500                      | 1:12                        | 50                  | 6           | 75.79                      |
| 16  | 2000                      | 1:10                        | 55                  | 5           | 82.17                      |
| 17  | 2000                      | 1:10                        | 45                  | 5           | 79.63                      |
| 18  | 2500                      | 1:10                        | 50                  | 5           | 91.81                      |
| 19  | 2000                      | 1:10                        | 55                  | 7           | 90.49                      |
| 20  | 2500                      | 1:10                        | 45                  | 6           | 89.73                      |
| 21  | 2000                      | 1:10                        | 50                  | 6           | 95.80                      |
| 22  | 2500                      | 1:12                        | 50                  | 6           | 88.12                      |
| 23  | 1500                      | 1:10                        | 50                  | 7           | 82.35                      |
| 24  | 2500                      | 1:10                        | 55                  | 6           | 88.77                      |
| 25  | 2000                      | 1:10                        | 50                  | 6           | 92.35                      |
| 26  | 1500                      | 1:8                         | 50                  | 6           | 70.87                      |
| 27  | 2000                      | 1:12                        | 45                  | 6           | 87.41                      |
| 28  | 1500                      | 1:10                        | 55                  | 6           | 88.20                      |
| 29  | 2000                      | 1:10                        | 50                  | 6           | 89.82                      |
